# Supplementary material for: Spatio-temporal modeling of visceral leishmaniasis in Midwest Brazil: An ecological study of 18-years data (2001–2018)
Source: PLOS journal article supplement (doi:10.1371/journal.pone.0240218), 2020-10-02
Supplement: S1 (10.1371/journal.pone.0240218.s001) [file journal.pone.0240218.s001]

## Supporting Information

**S1 Table. Descriptive measures of predictor/explanatory variables assessed in the study.**

| Source  | Variable                                                                                        | Mean      | Median   | Standard deviation | Minimum | Maximum   |
|---------|-------------------------------------------------------------------------------------------------|-----------|----------|--------------------|---------|-----------|
| IBGE    |                                                                                                 |           |          |                    |         |           |
|         | Number of permanent private households                                                          | 3,321.20  | 2,635    | 2,314.69           | 305.00  | 11,005.00 |
|         | Total number of residents per permanent private household                                       | 10,382.04 | 8,242    | 7,518.75           | 942.00  | 36,011.00 |
|         | Average number of residents in permanent private housing units                                  | 3.08      | 3.11     | 0.22               | 2.34    | 3.53      |
|         | Income – value of median monthly nominal income of persons $\geq 10$ years of age               | 666.64    | 510      | 288.87             | 0.00    | 1,500.00  |
|         | Proportion of the population with a toilet at home                                              | 3318.66   | 2,631    | 2,313.16           | 305.00  | 10,998.00 |
|         | Proportion of the population with household water supply                                        | 3,041.51  | 2,455    | 2,143.11           | 198.00  | 10,762.00 |
|         | Proportion of the population with regular garbage collection by a public cleaning service       | 3,312.89  | 2,633.50 | 2,311.06           | 280.00  | 11,002.00 |
| PLANURB |                                                                                                 |           |          |                    |         |           |
|         | Education index – reflects the educational situation of the population and was calculated from: | 0.68      | 0.72     | 0.21               | 0.12    | 0.99      |

|  |                                                                                                                                                                                                                                                                                                                                                                                                                                                                                             |      |      |      |      |      |
|--|---------------------------------------------------------------------------------------------------------------------------------------------------------------------------------------------------------------------------------------------------------------------------------------------------------------------------------------------------------------------------------------------------------------------------------------------------------------------------------------------|------|------|------|------|------|
|  | <ul style="list-style-type: none"> <li>• % of heads of permanent private housing units with <math>\geq 1</math> year of schooling;</li> <li>• % of literate people <math>&gt; 15</math> years of age;</li> <li>• Average number of years of education of persons responsible for permanent private housing units;</li> <li>• Literacy rate of individuals aged 15 to 24 years.</li> </ul>                                                                                                   |      |      |      |      |      |
|  | <p>Income and poverty index – reflects the economic situation of the population income inequality levels and was calculated from:</p> <ul style="list-style-type: none"> <li>• % of heads of permanent private housing units with a nominal monthly income higher than 01 minimum wage;</li> <li>• % of heads of permanent private housing units with monthly nominal income;</li> <li>• Average monthly nominal income of persons in charge of permanent private housing units.</li> </ul> | 0.35 | 0.31 | 0.23 | 0.00 | 0.99 |
|  | <p>Environmental sanitation index – reflects urban services infrastructure and was calculated from the proportions of households with:</p> <ul style="list-style-type: none"> <li>• A regular garbage collection service;</li> <li>• Piped drinking water;</li> <li>• Sewage pipes;</li> <li>• Bathroom or toilet.</li> </ul>                                                                                                                                                               | 0.80 | 0.86 | 0.17 | 0.17 | 0.99 |
|  | <p>Housing and living conditions index – reflects housing conditions and was calculated from:</p> <ul style="list-style-type: none"> <li>• % of own permanent private housing units built on own land;</li> </ul>                                                                                                                                                                                                                                                                           | 0.62 | 0.60 | 0.12 | 0.24 | 0.97 |

|                    |                                                                                                                                                                                                          |      |      |      |      |      |
|--------------------|----------------------------------------------------------------------------------------------------------------------------------------------------------------------------------------------------------|------|------|------|------|------|
|                    | <ul style="list-style-type: none"> <li>• % of persons residing in permanent private housing units;</li> <li>• Average number of bathrooms for exclusive use of residents in these households.</li> </ul> |      |      |      |      |      |
|                    | Urban Quality of Life Index – reflects urban quality of life in terms of the four indices listed above.                                                                                                  | 0.61 | 0.59 | 0.16 | 0.20 | 0.95 |
| SAUER et al., 2012 |                                                                                                                                                                                                          |      |      |      |      |      |
|                    | Social exclusion index                                                                                                                                                                                   | 0.53 | 0.55 | 0.21 | 0.05 | 0.96 |
|                    | Poverty of the persons responsible for permanent private housing units                                                                                                                                   | 0.62 | 0.71 | 0.30 | 0.00 | 1.00 |
|                    | Income inequality                                                                                                                                                                                        | 0.87 | 0.97 | 0.22 | 0.00 | 1.00 |
|                    | Literacy rate                                                                                                                                                                                            | 0.39 | 0.34 | 0.26 | 0.00 | 1.00 |
|                    | Years of education of persons responsible for permanent private housing units                                                                                                                            | 0.35 | 0.32 | 0.26 | 0.00 | 1.00 |

Abbreviations: IBGE, Brazilian Institute of Geography and Statistics; PLANURB, Municipal Department of Environment and Urban Planning of Campo Grande.
